# Supplementary figures and images for: Motoneurons are essential for vascular pathfinding
Source: Oxford University Press journal article supplement (doi:10.1242/dev.068403), 2011-08-09

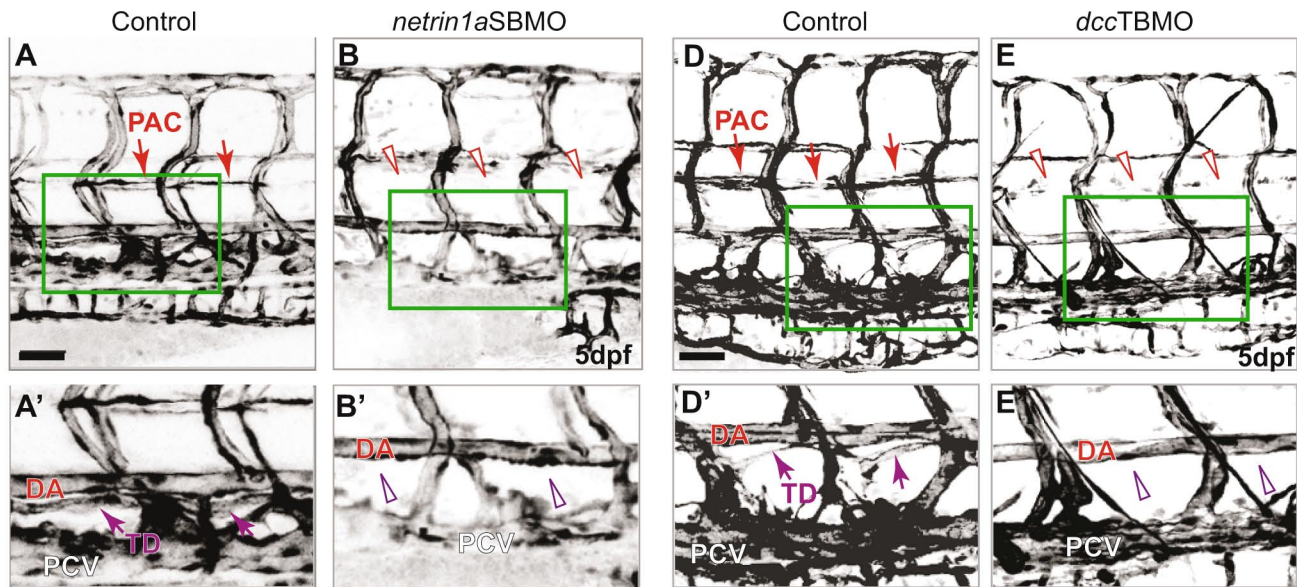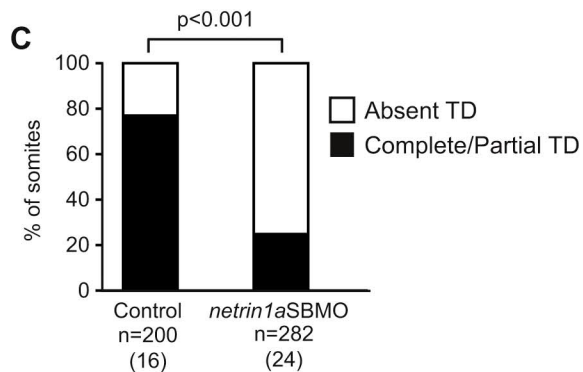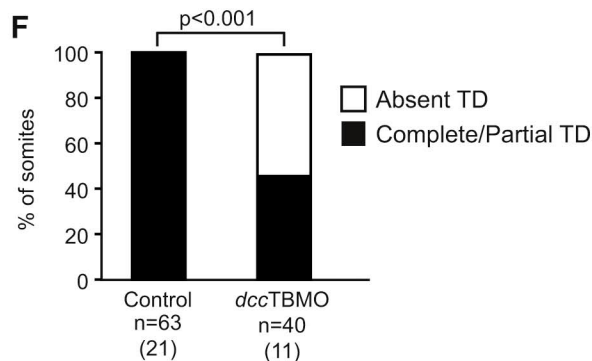

Supplement: dev068403-sup-dev06840figs1.pdf [file dev068403-sup-dev06840figs1.pdf]

*plcg1<sup>y10</sup>;fli1a:egfp<sup>y1</sup>*

*plcg1<sup>y10</sup>;fli1a:egfp<sup>y1</sup>*  
+ *netrin1a*SBMO

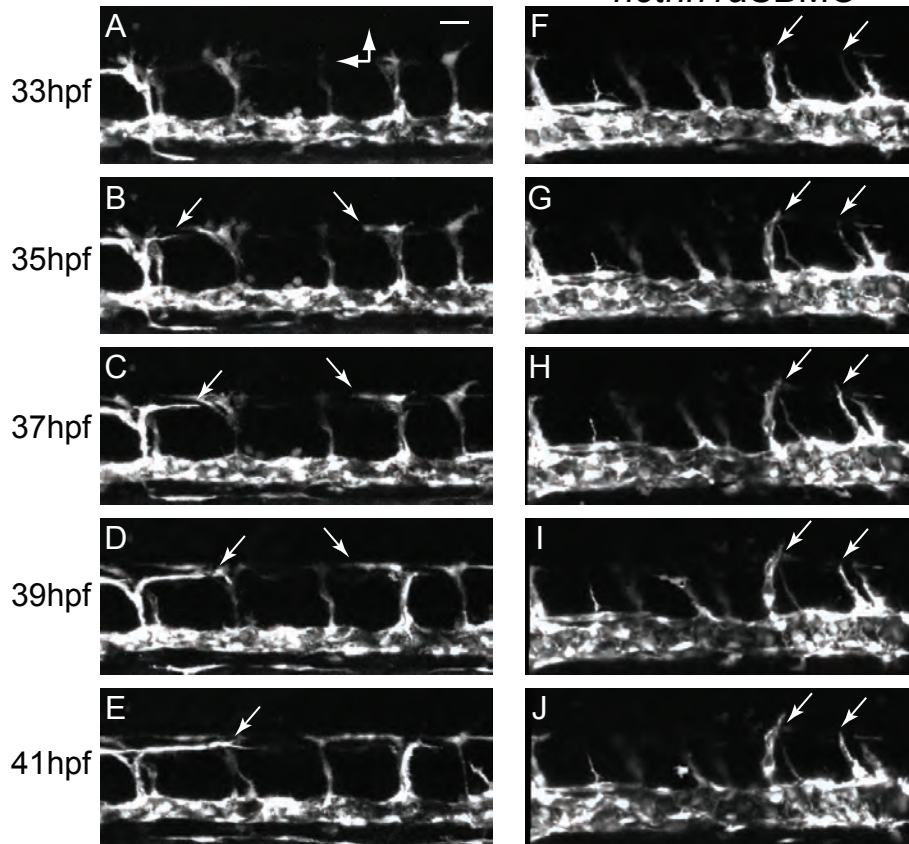

Supplement: dev068403-sup-dev06840figs2.pdf [file dev068403-sup-dev06840figs2.pdf]

DMSO

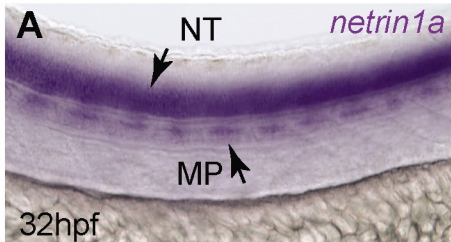

cyclopamine

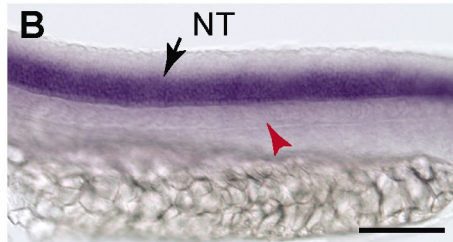

Supplement: dev068403-sup-dev06840figs3.pdf [file dev068403-sup-dev06840figs3.pdf]

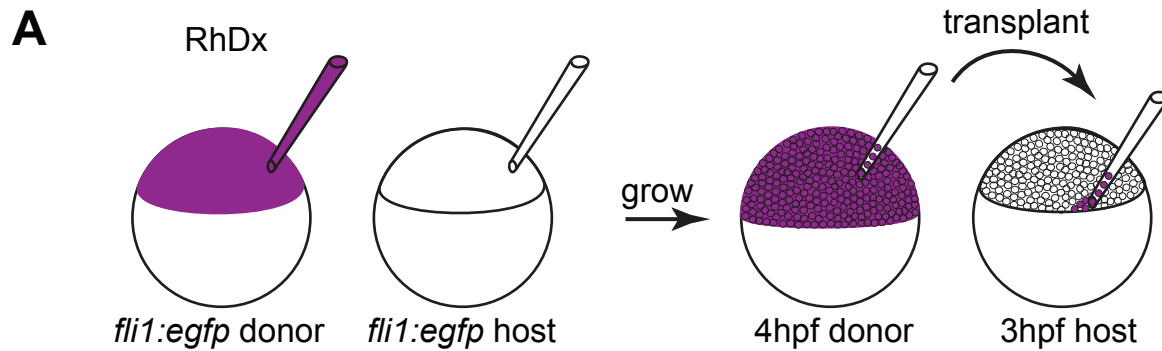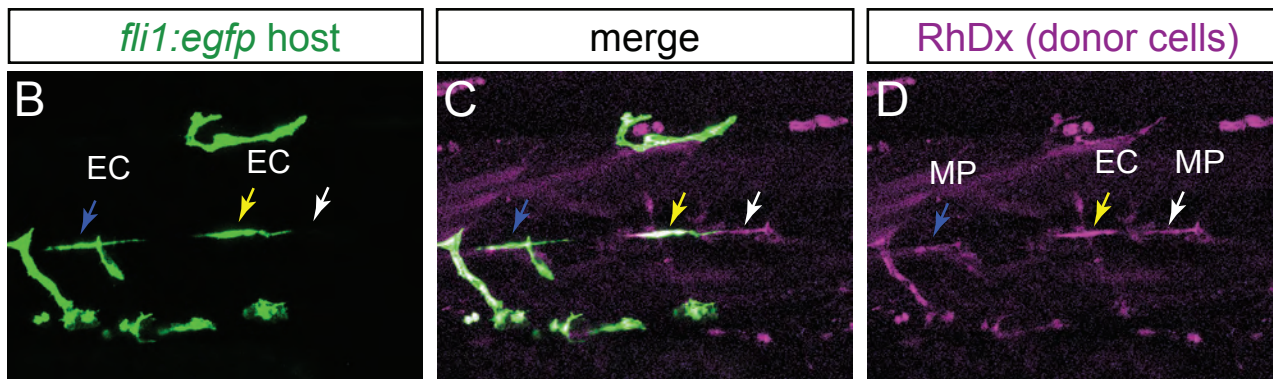

Supplement: dev068403-sup-dev06840figs4.pdf [file dev068403-sup-dev06840figs4.pdf]

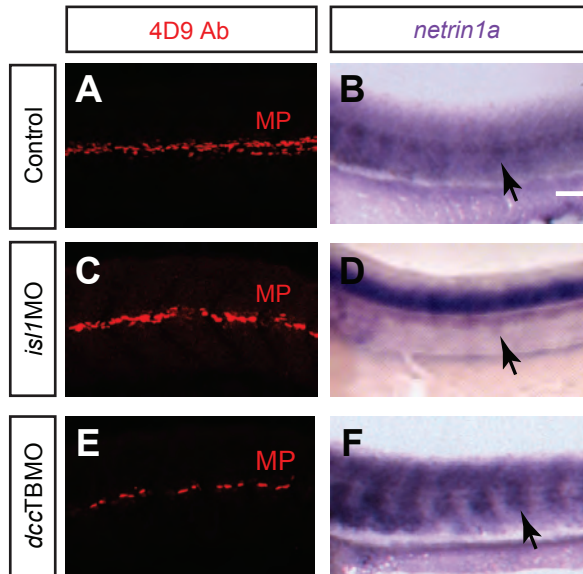

Supplement: dev068403-sup-dev06840figs5.pdf [file dev068403-sup-dev06840figs5.pdf]

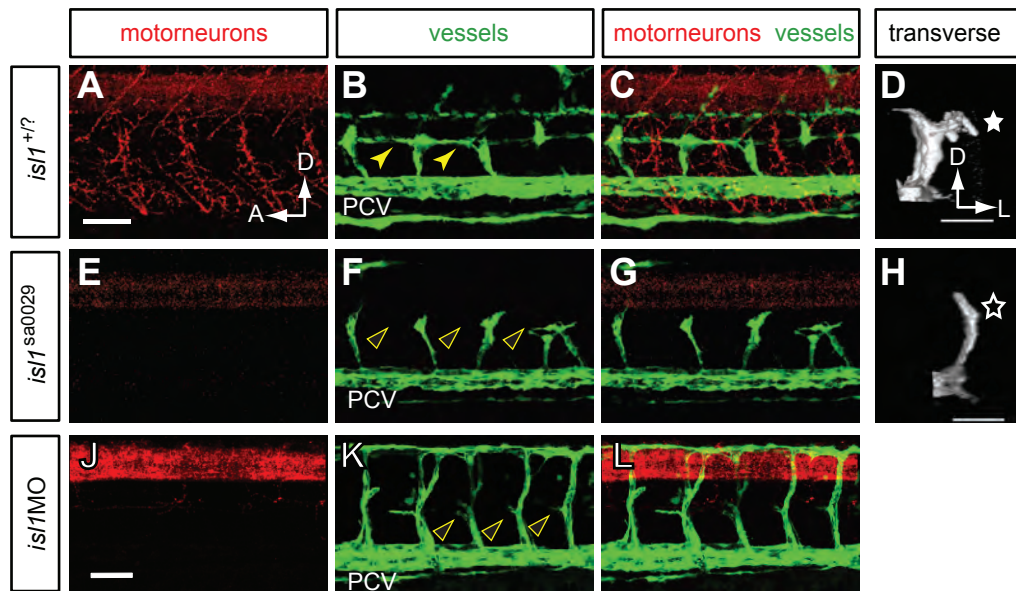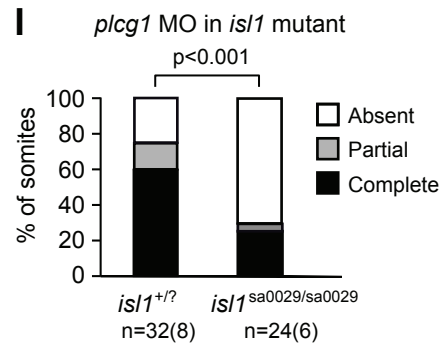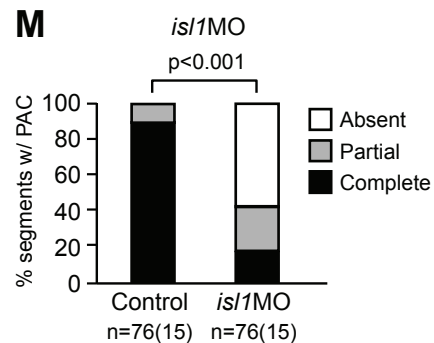

Supplement: dev068403-sup-dev06840figs6.pdf [file dev068403-sup-dev06840figs6.pdf]
